# Supplementary material for: Post-hot-cast annealing deposition of perovskite films with infused multifunctional organic molecules to enhance the performance of large-area light-emitting devices
Source: Royal Society of Chemistry journal article supplement (doi:10.1039/d4ra02652g), 2024-01-01
Supplement: d4ra02652g1.pdf [file d4ra02652g1.pdf]

## Supplementary Information

### **Post-hot cast annealing deposition of perovskite films with infused multifunctional organic molecules to enhance the performance of large-area light-emitting devices**

Ching-Ho Tien<sup>1,2,\*</sup>, Jun-Qing Liu<sup>3</sup>, and Lung-Chien Chen<sup>3,\*</sup>

<sup>1</sup>*Department of Electronic Engineering, Ming Chi University of Technology, No. 84, Gungjuan Rd., New Taipei City 24301, Taiwan; chtien@mail.mcut.edu.tw (C.-H.T.)*

<sup>2</sup>*Organic Electronics Research Center, Ming Chi University of Technology, No. 84, Gungjuan Rd., New Taipei City 24301, Taiwan.*

<sup>3</sup>*Department of Electro-Optical Engineering, National Taipei University of Technology, No. 1, Sec. 3, Chung-Hsiao E. Rd., Taipei 10608, Taiwan; mango51103@gmail.com (J.-Q.L.)*

Corresponding Author

\*E-mail: chtien@mail.mcut.edu.tw and ocean@ntut.edu.tw

**Table S1.** Optical properties of CsPbBr<sub>2.5</sub>Cl<sub>0.5</sub> films with different preparation methods and different doping APDO contents.

| <b>Sample</b>     | <b>PL (nm)</b> | <b>FWHM (nm)</b> | <b>PLQY(%)</b> | <b>Lifetime (ns)</b> |
|-------------------|----------------|------------------|----------------|----------------------|
| Spin coating (SC) | 507            | 19.80            | 7.22           | 0.742                |
| Hot-casting (HC)  | 508            | 18.74            | 9.0            | 0.964                |
| HC-1mg APDO       | 508            | 18.39            | 10.44          | 0.839                |
| HC-2mg APDO       | 508            | 18.03            | 14.45          | 1.137                |
| HC-3mg APDO       | 508            | 18.31            | 11.82          | 1.001                |

**Table S2.** Optoelectronic performance of the CsPbBr<sub>2.5</sub>Cl<sub>0.5</sub> PeLEDs with different preparation methods and different doping APDO contents.

|                      | V <sub>on</sub><br>(V) | Max. L<br>(cd/m <sup>2</sup> ) | Max. CE<br>(cd/A) | Max. EQE<br>(%) | EL/FWHM<br>(nm) |
|----------------------|------------------------|--------------------------------|-------------------|-----------------|-----------------|
| SC-PeLED             | 3                      | 263                            | 0.207             | 0.074           | 510/20.3        |
| HC-PeLED             | 2.5                    | 1177                           | 3.88              | 1.38            | 510/20.5        |
| HC-1mg APDO<br>PeLED | 2.5                    | 2118                           | 5.39              | 2.21            | 508/21.9        |
| HC-2mg APDO<br>PeLED | 2.5                    | 2659                           | 6.86              | 2.81            | 506/21.8        |
| HC-3mg APDO<br>PeLED | 2.5                    | 1477                           | 3,64              | 1.49            | 508/21.6        |
